# Supplementary material for: Continuous inertial microparticle and blood cell separation in straight channels with local microstructures
Source: Royal Society of Chemistry journal article supplement (doi:10.1039/c5lc01435b), 2015-12-10
Supplement: c5lc01435b1.pdf [file c5lc01435b1.pdf]

Supplemental information for:

## Continuous inertial microparticle and blood cell separation in straight channels with local microstructures

by

Zhenlong Wu,<sup>a,b</sup> Yu Chen,<sup>§c</sup> Moran Wang,<sup>c</sup> and Aram J. Chung<sup>\*a</sup>

<sup>a</sup>Department of Mechanical, Aerospace, and Nuclear Engineering, Rensselaer Polytechnic Institute (RPI), 110 8<sup>th</sup> Street, Troy, NY 12180, USA. Email: [chungaj6@rpi.edu](mailto:chungaj6@rpi.edu).

<sup>b</sup>School of Aeronautic science and engineering, Beihang University, Beijing 100191, China.

<sup>c</sup>Department of Engineering Mechanics, School of Aerospace, Tsinghua University, Beijing 100084, China

<sup>§</sup>Present address: Department of Civil and Environmental Engineering, University of Illinois at Urbana-Champaign, Urbana, IL 61801, USA

### Supplemental Figures

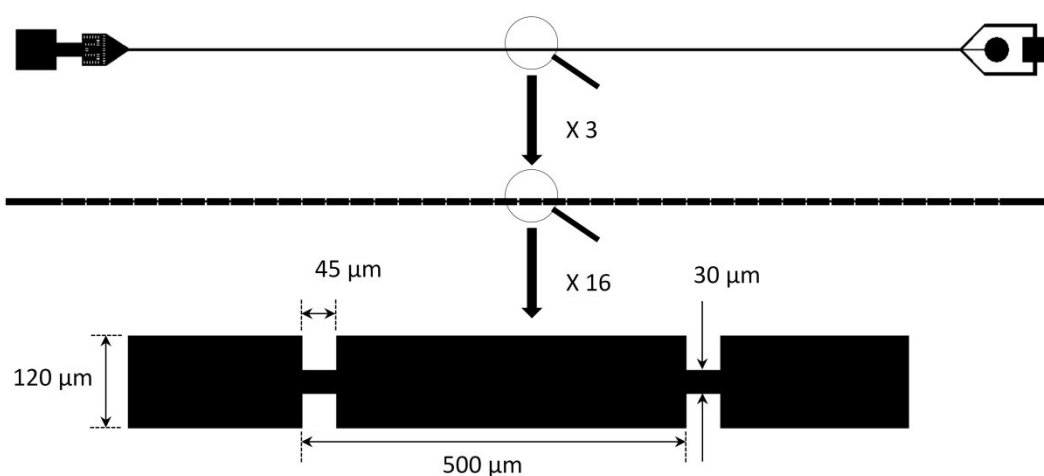

**Figure S1.** A CAD layout of the inertial particle and cell sorter. The device consists of three sections: (1) A straight rectangular channel (a length of 2.5 cm), (2) A channel with 40 symmetrically positioned square microstructures (a total length of 2 cm), and (3) A straight rectangular channel with a trifurcating outlet (a length of 0.5 cm). The channel height of 21  $\mu\text{m}$  is maintained.

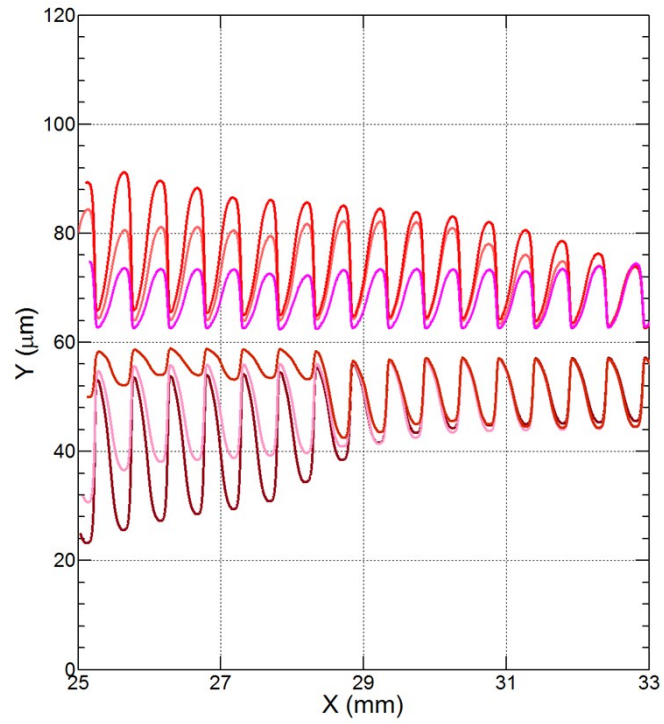

**Figure S2.** Six 5.5  $\mu\text{m}$  polystyrene particle trajectories. Based on particle initial position and particle-particle interaction, particles initially exhibit different trajectories though later they show similar stable motions by the secondary flows from microstructures.

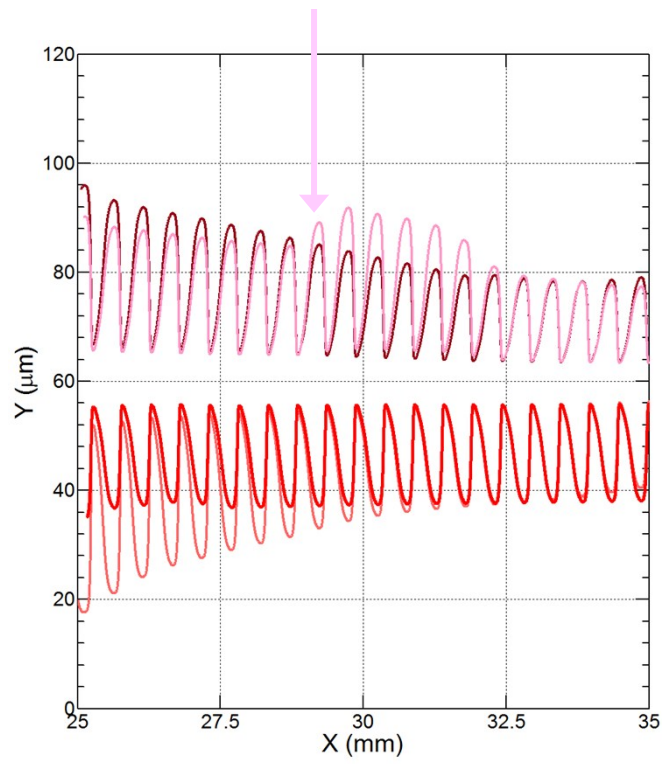

**Figure S3.** Four 5.5  $\mu\text{m}$  polystyrene particle trajectories. Due to the particle crosstalk near  $X \approx 29$  mm, a particle trajectory (pink) is modified but later it stabilizes back.

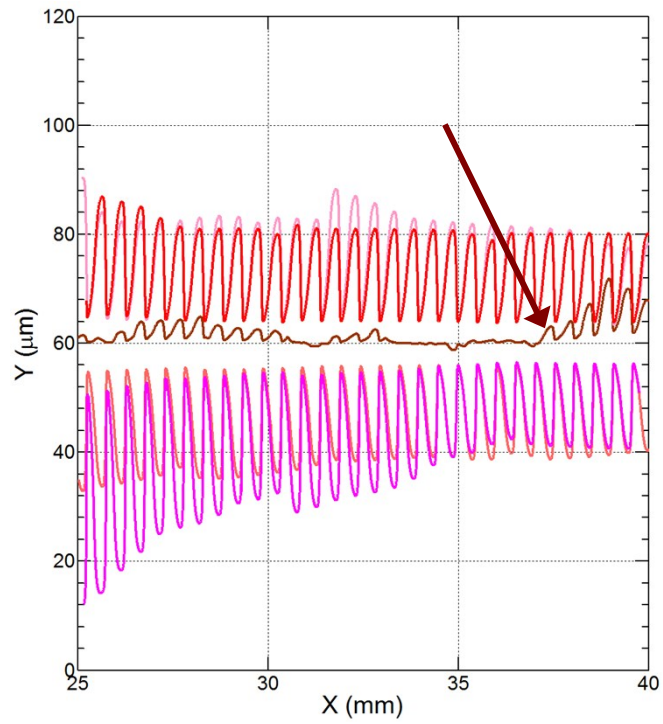

**Figure S4.** Favourable particle-particle interaction. A particle positioned initially in the channel centre could escape with an assist of the particle-particle interaction ( $X \approx 37.5$  mm).

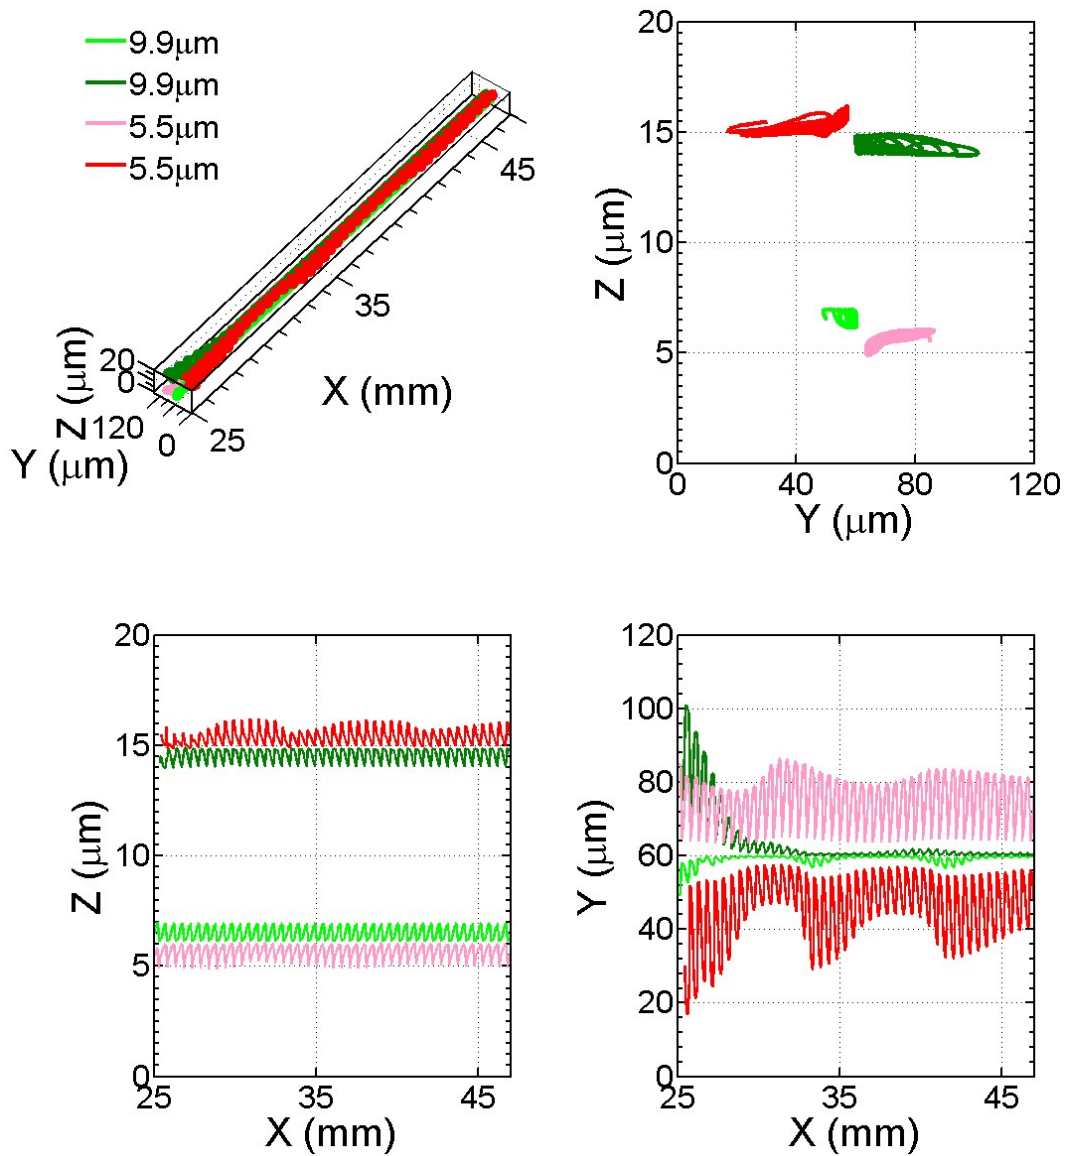

**Figure S5.** Microparticle migrations of a mixed sample (two 9.9 and two 5.5  $\mu\text{m}$  polystyrene microspheres) for a longer range.

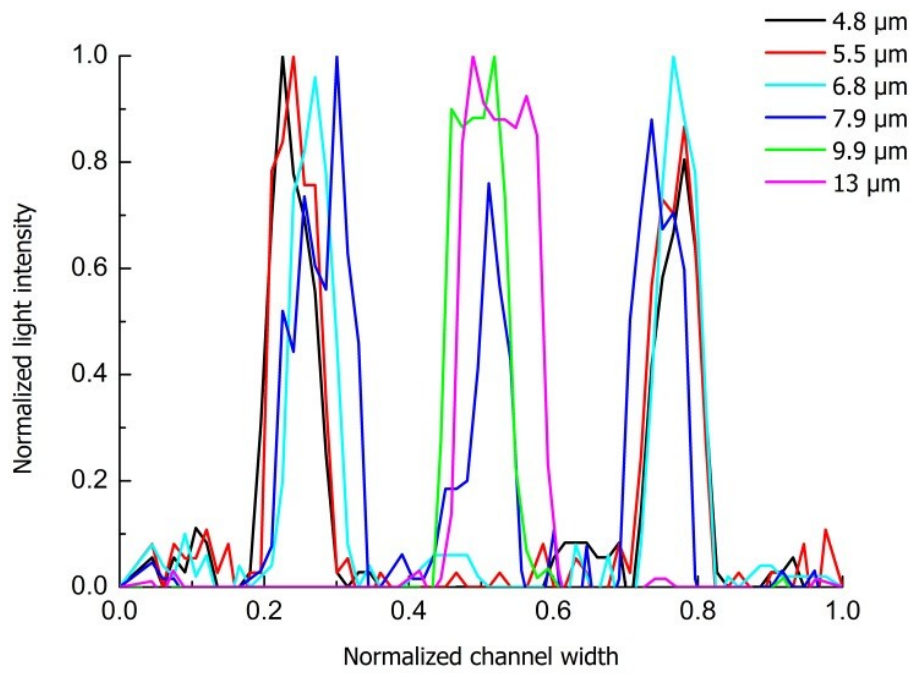

**Figure S6.** A normalized light intensity plot of particle distribution as a function of different particle sizes with a fixed Reynolds number of 35.5. All lines are generated from 2000 image stacks.

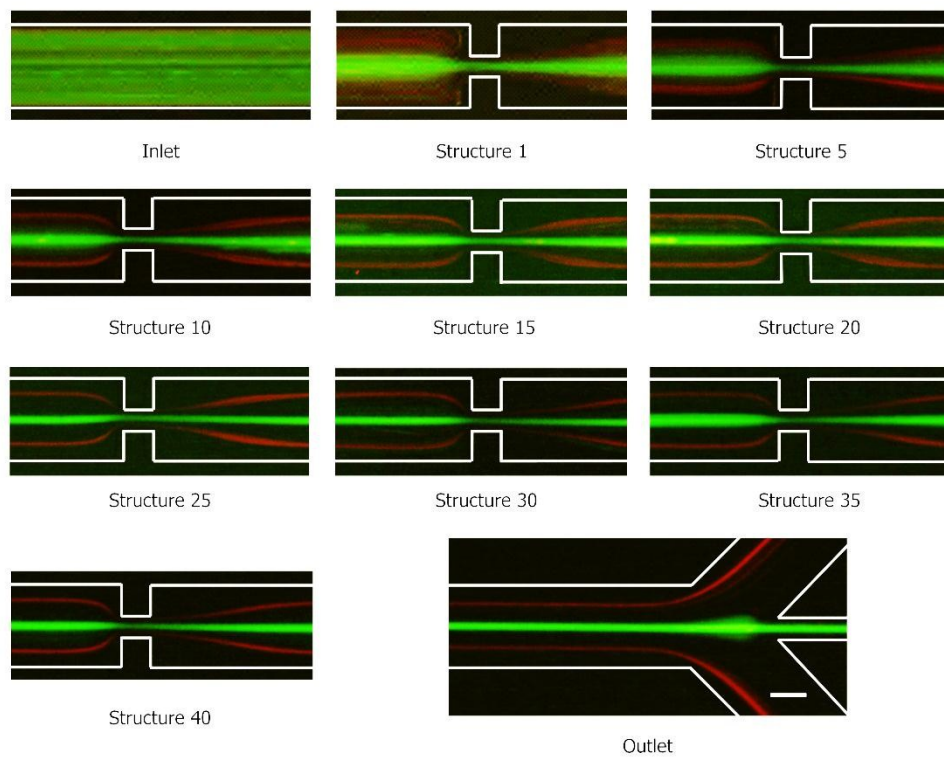

**Figure S7.** Fluorescent images from top-view as particles flow downstream. A mixture of 5.5  $\mu\text{m}$  (red) and 9.9  $\mu\text{m}$  (green) particles is clearly separated. Scale bar represents 50  $\mu\text{m}$ .

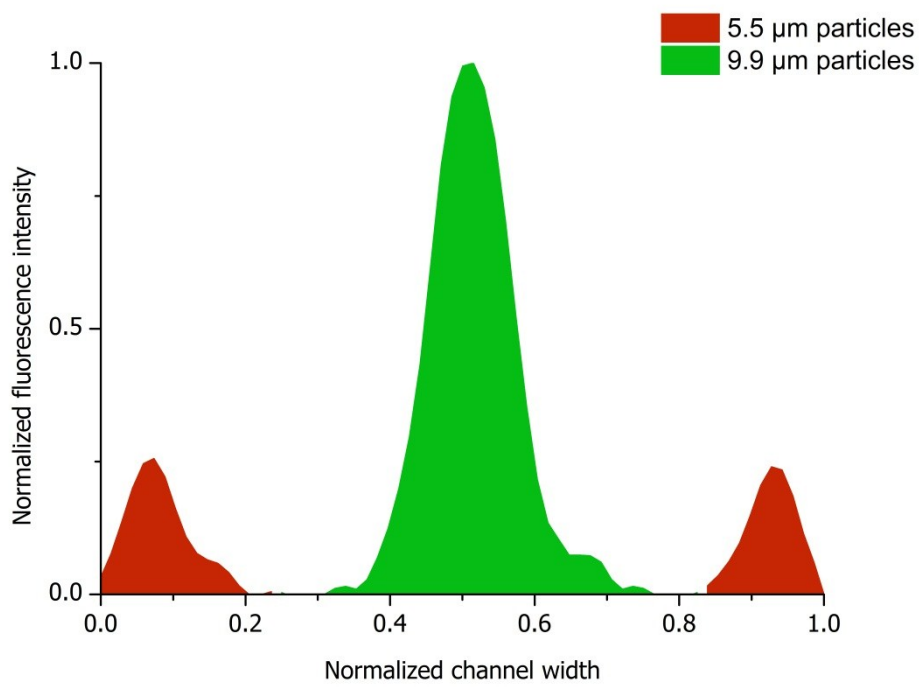

**Figure S8.** A normalized fluorescence intensity plot of Fig. S7 near the outlet.



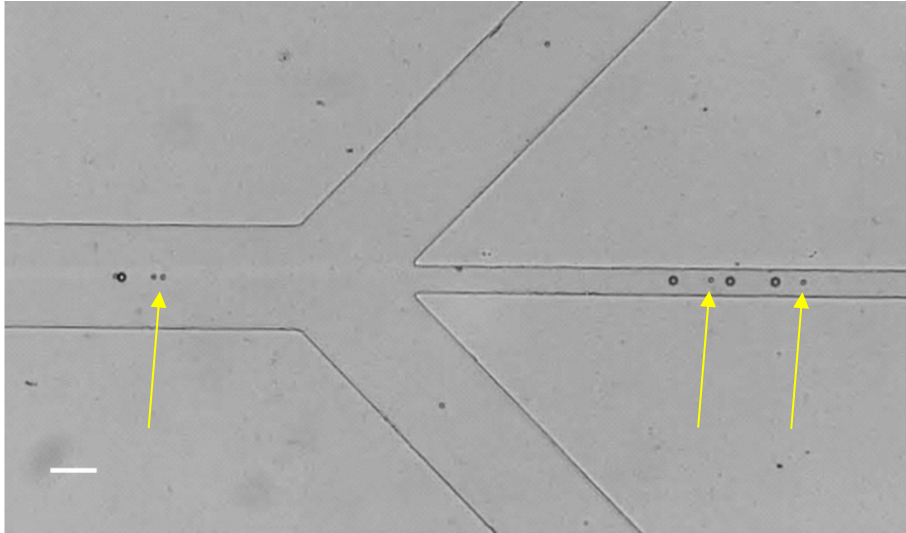

**Figure S9.** High microsphere concentration test. Due to the undesirable particle-particle interactions at higher particle concentrations, small particles were migrated to the channel centre. Scale bar represents 50  $\mu\text{m}$ .

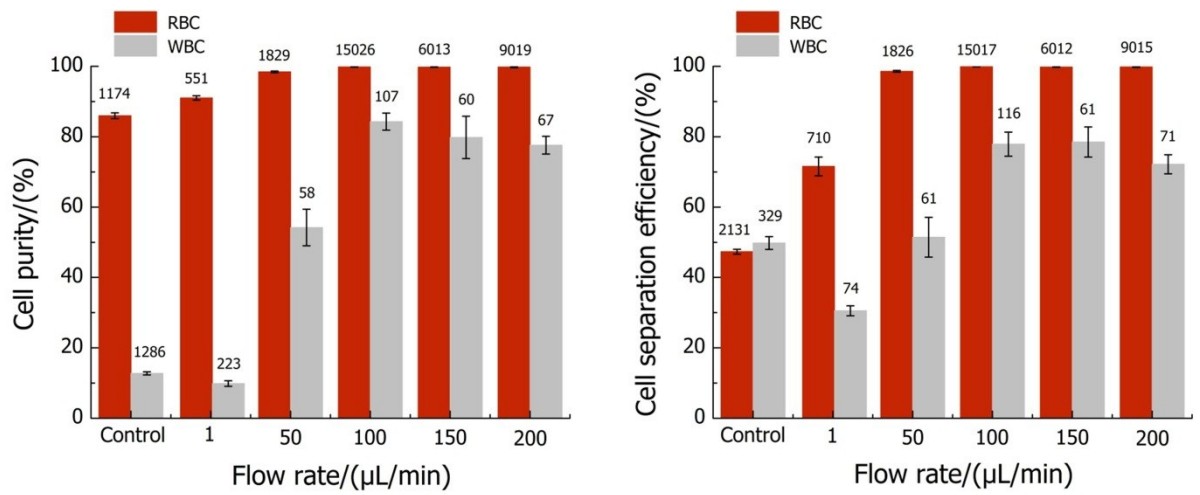

**Figure S10.** Purity and separation efficiency of RBCs and WBCs of 0.5% diluted human blood at various flow conditions.

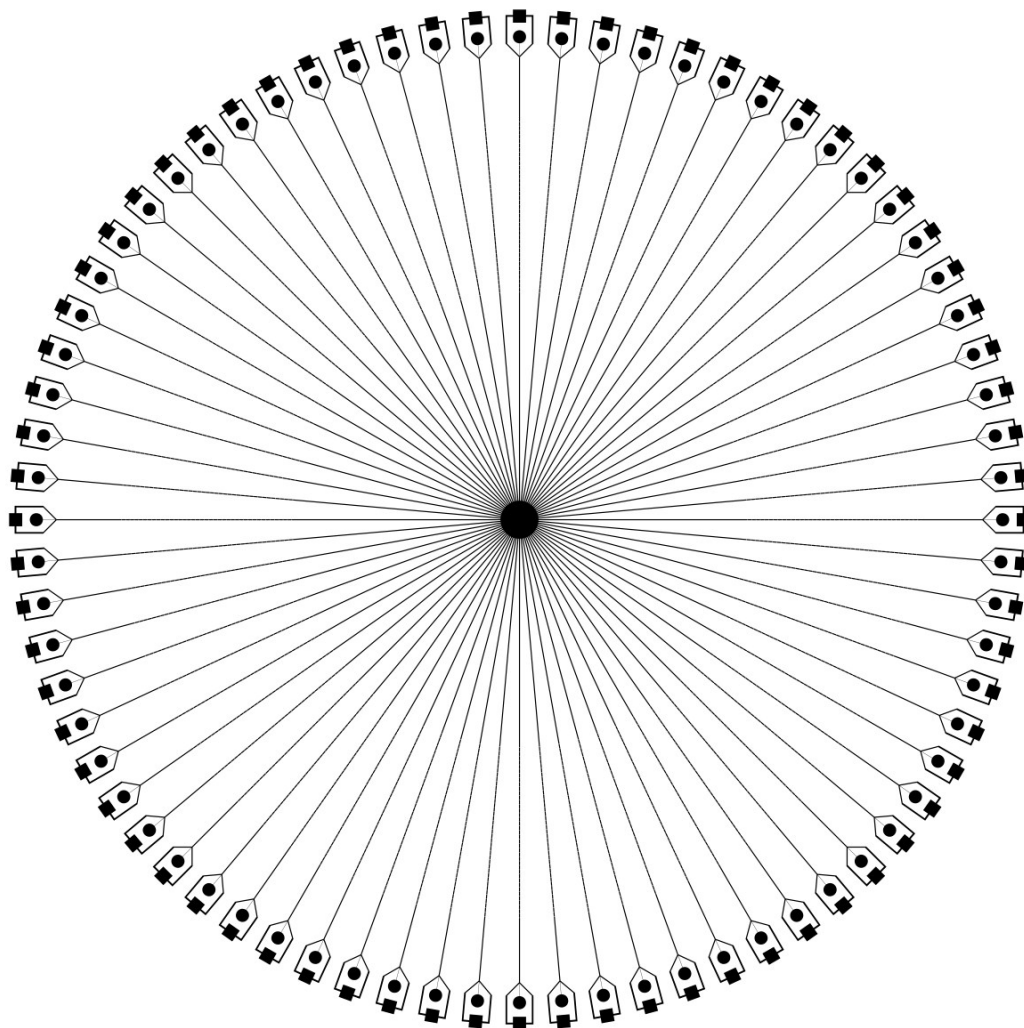

**Figure S11.** Illustration of a paralleled device with 72 individual channels radially arrayed with a single inlet and two ring outlets. It is expected that we can separate RBCs and WBCs with a throughput of 10.8 mL/min for 0.25% diluted blood.

## Supporting Movie Captions

Supplemental Movie S1. **Separation of a microsphere mixture.** A video demonstrating 5.5  $\mu\text{m}$  (0.001% w/w) and 9.9  $\mu\text{m}$  (0.01% w/w) microparticle separation. Test was operated at a flow rate of 150  $\mu\text{L}/\text{min}$ .

Supplemental Movie S2. **Single-size particle migrations of four 9.9  $\mu\text{m}$  polystyrene microspheres.** A lattice-Boltzmann method based numerical prediction of large particle behaviours at  $Re = 35.5$ .

Supplemental Movie S3. **Single-size particle migrations of four 5.5  $\mu\text{m}$  polystyrene microspheres.** A lattice-Boltzmann method based numerical prediction of small particle behaviours at  $Re = 35.5$ .

Supplemental Movie S4. **Single-size particle migrations of a mixed sample (two 9.9  $\mu\text{m}$  and two 5.5  $\mu\text{m}$  polystyrene microspheres).** A lattice-Boltzmann method based numerical prediction of mixed-sized particle behaviours at  $Re = 35.5$ .

Supplemental Movie S5. **Separation of RBCs and WBCs from 0.5% diluted human blood.** A video exhibiting RBC and WBC separation. Test was operated at a flow rate of 150  $\mu\text{L}/\text{min}$ .
